# Supplementary material
Source: publisher figshare collection journal article supplement (https://geolsoc.figshare.com/ndownloader/files/15086354)
Supplement: Supplementary file 1 [file 15086354]

## **Appendix: Towards resolving the metamorphic enigma of the Indian Plate in the NW Himalaya of Pakistan**

Peter J. Treloar<sup>1\*</sup>, Richard M. Palin<sup>2</sup>, Michael P. Searle<sup>3</sup>

*<sup>1</sup>School of The Natural and Built Environment, Kingston University, Penrhyn Road, Kingston upon Thames, Surrey, KT1 2EE, UK*

*<sup>2</sup>Department of Geology and Geological Engineering, Colorado School of Mines, Golden, Colorado 80401, USA*

*<sup>3</sup>Department of Earth Sciences, University of Oxford, South Parks Road, Oxford, OX1 3AN, UK*

*\*Corresponding author (e-mail: [p.j.treloar@kingston.ac.uk](mailto:p.j.treloar@kingston.ac.uk))*

---

Fig. S1–6. Full thin section photomicrograph images of samples (a) 166, plane-polarized light, (b) 166 crossed-polarized light, (c) 167, plane-polarized light, (d) 167 crossed-polarized light, (e) N151, plane-polarized light, (f) N151 crossed-polarized light. Field of view in all cases in ~30 mm along the long axis.



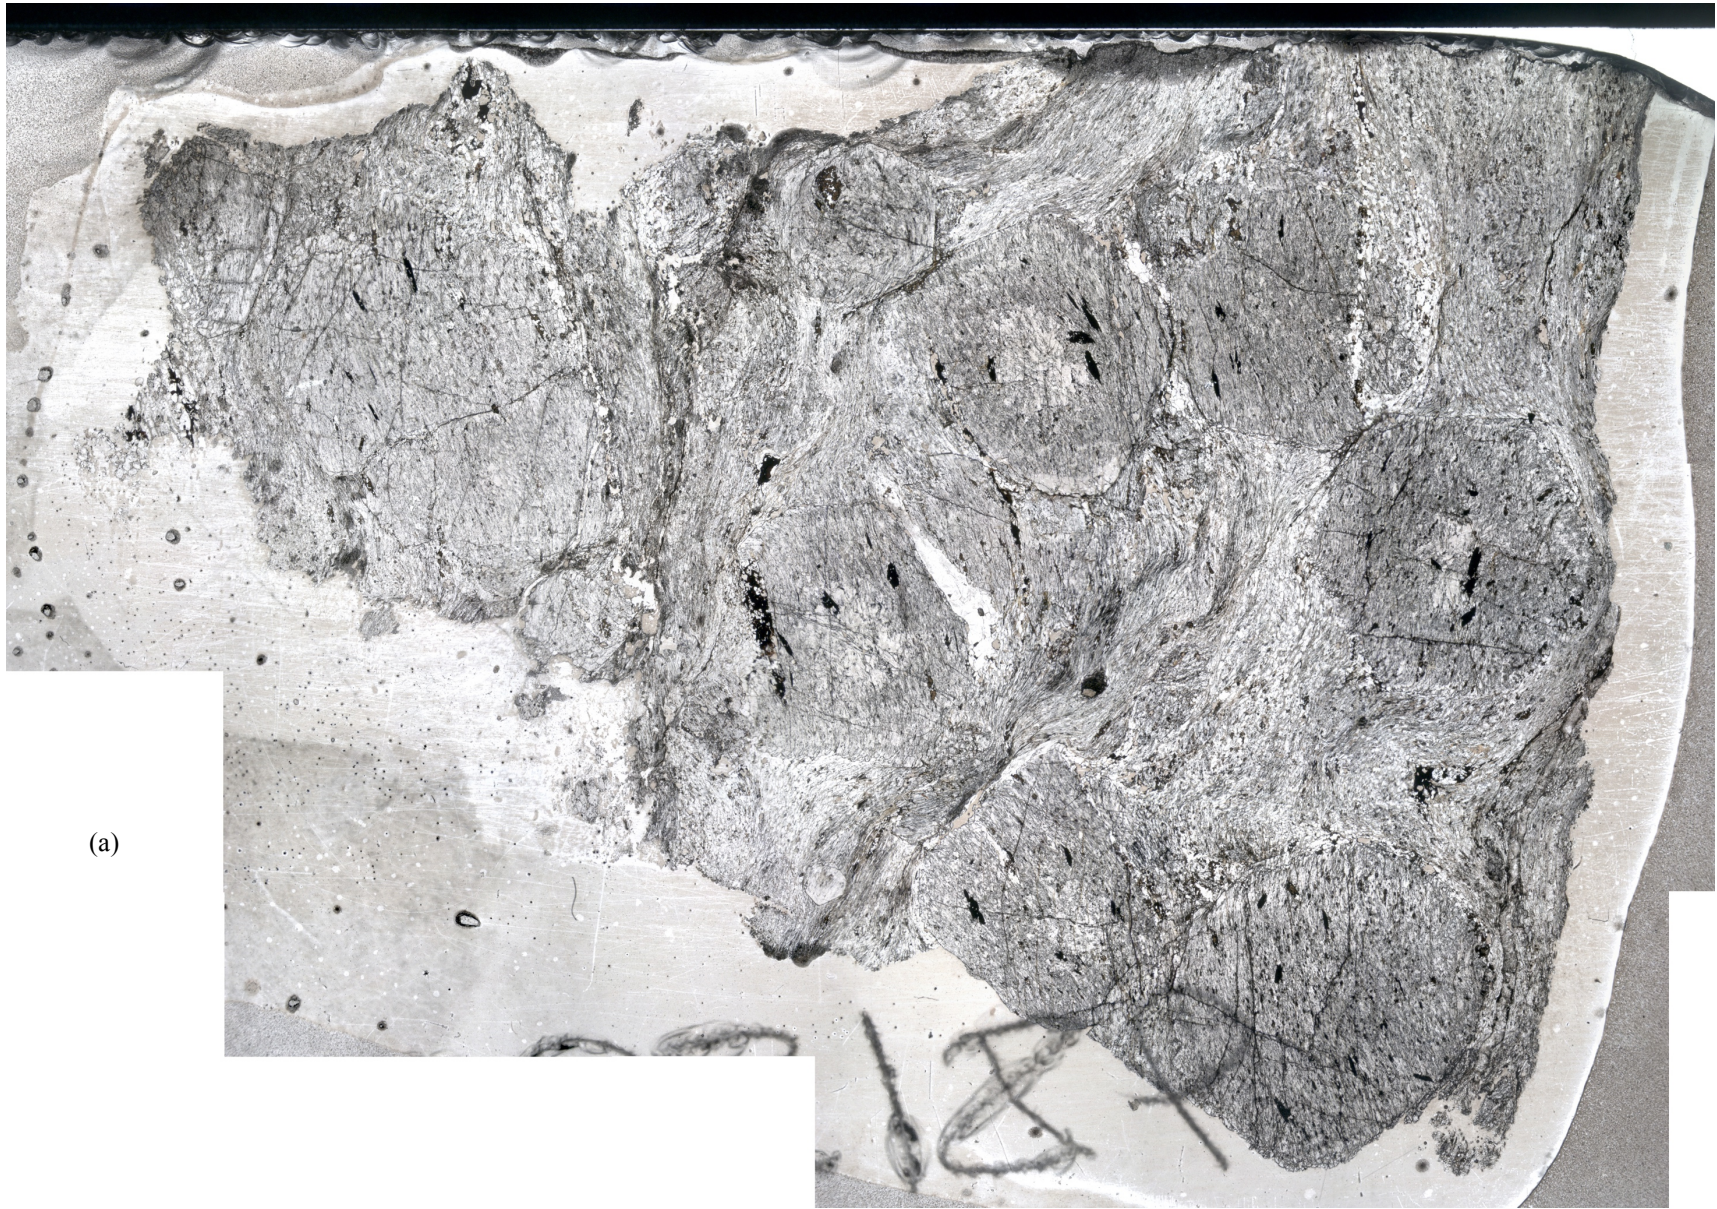

(a)



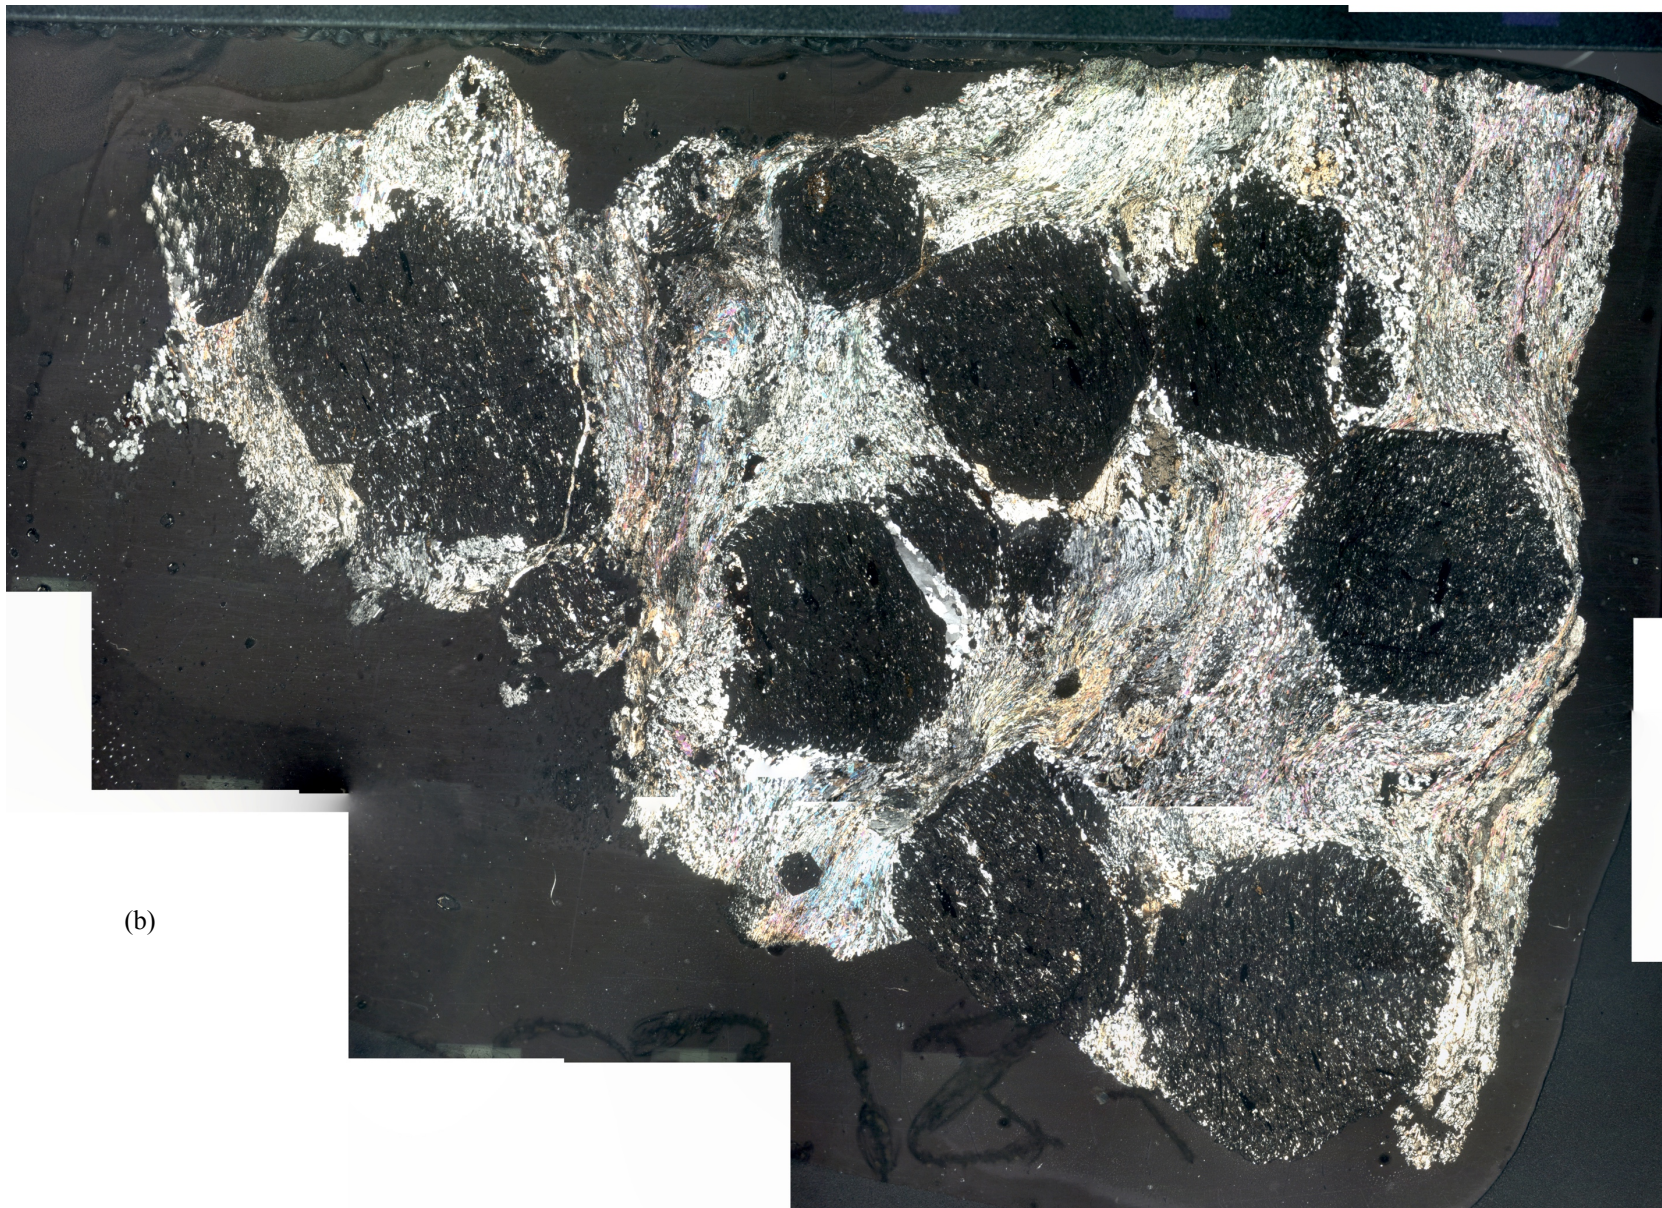

(b)



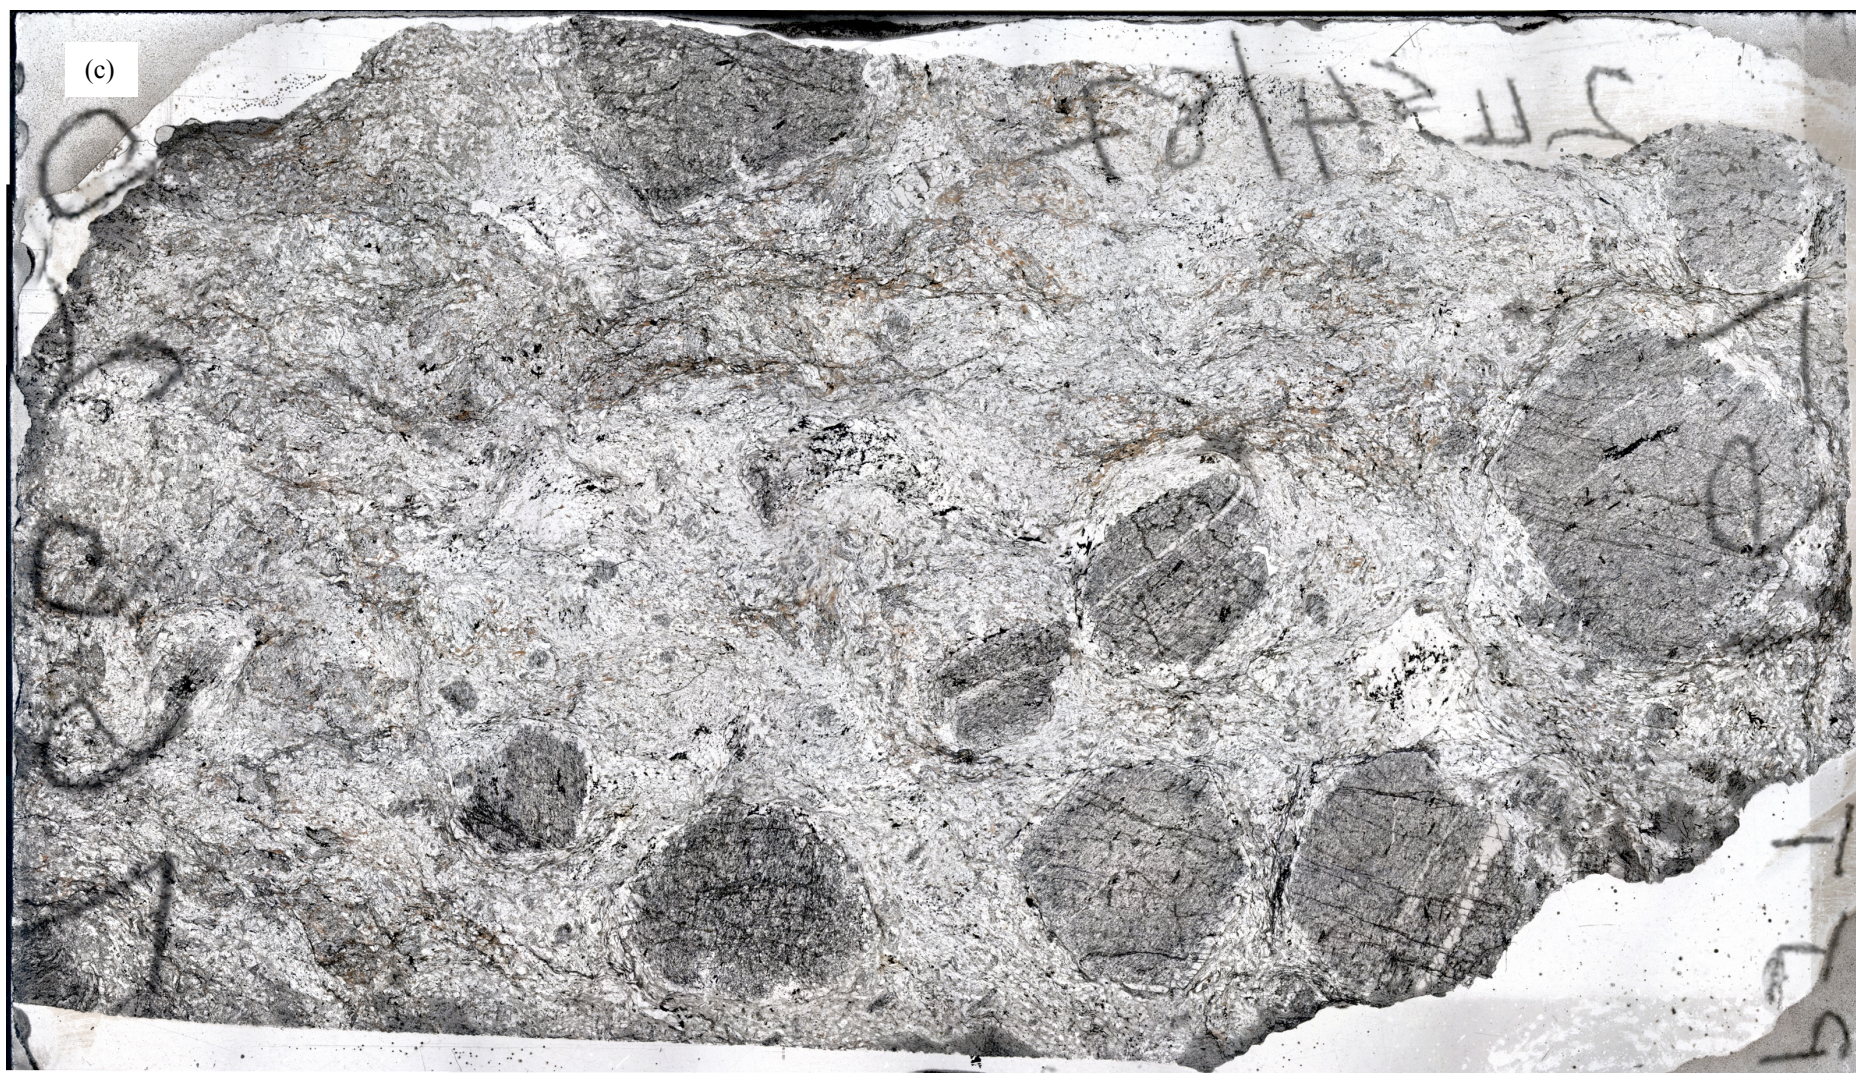



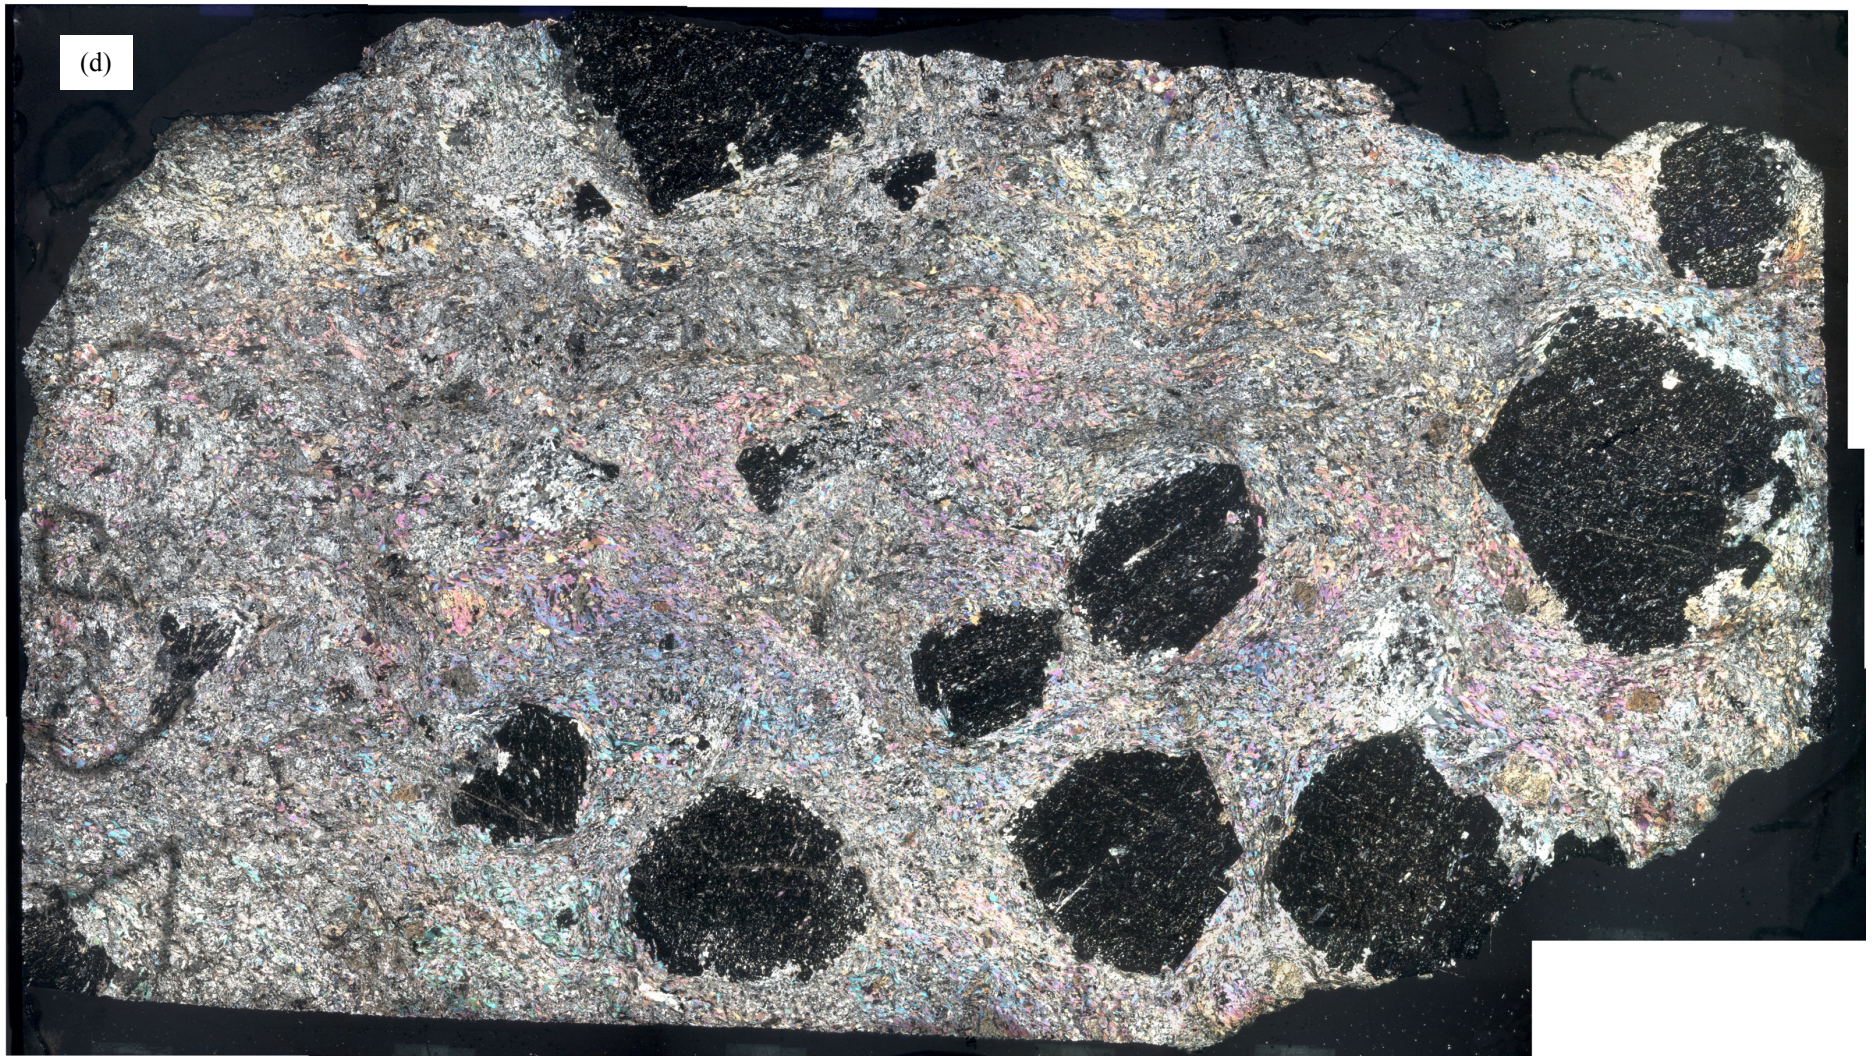



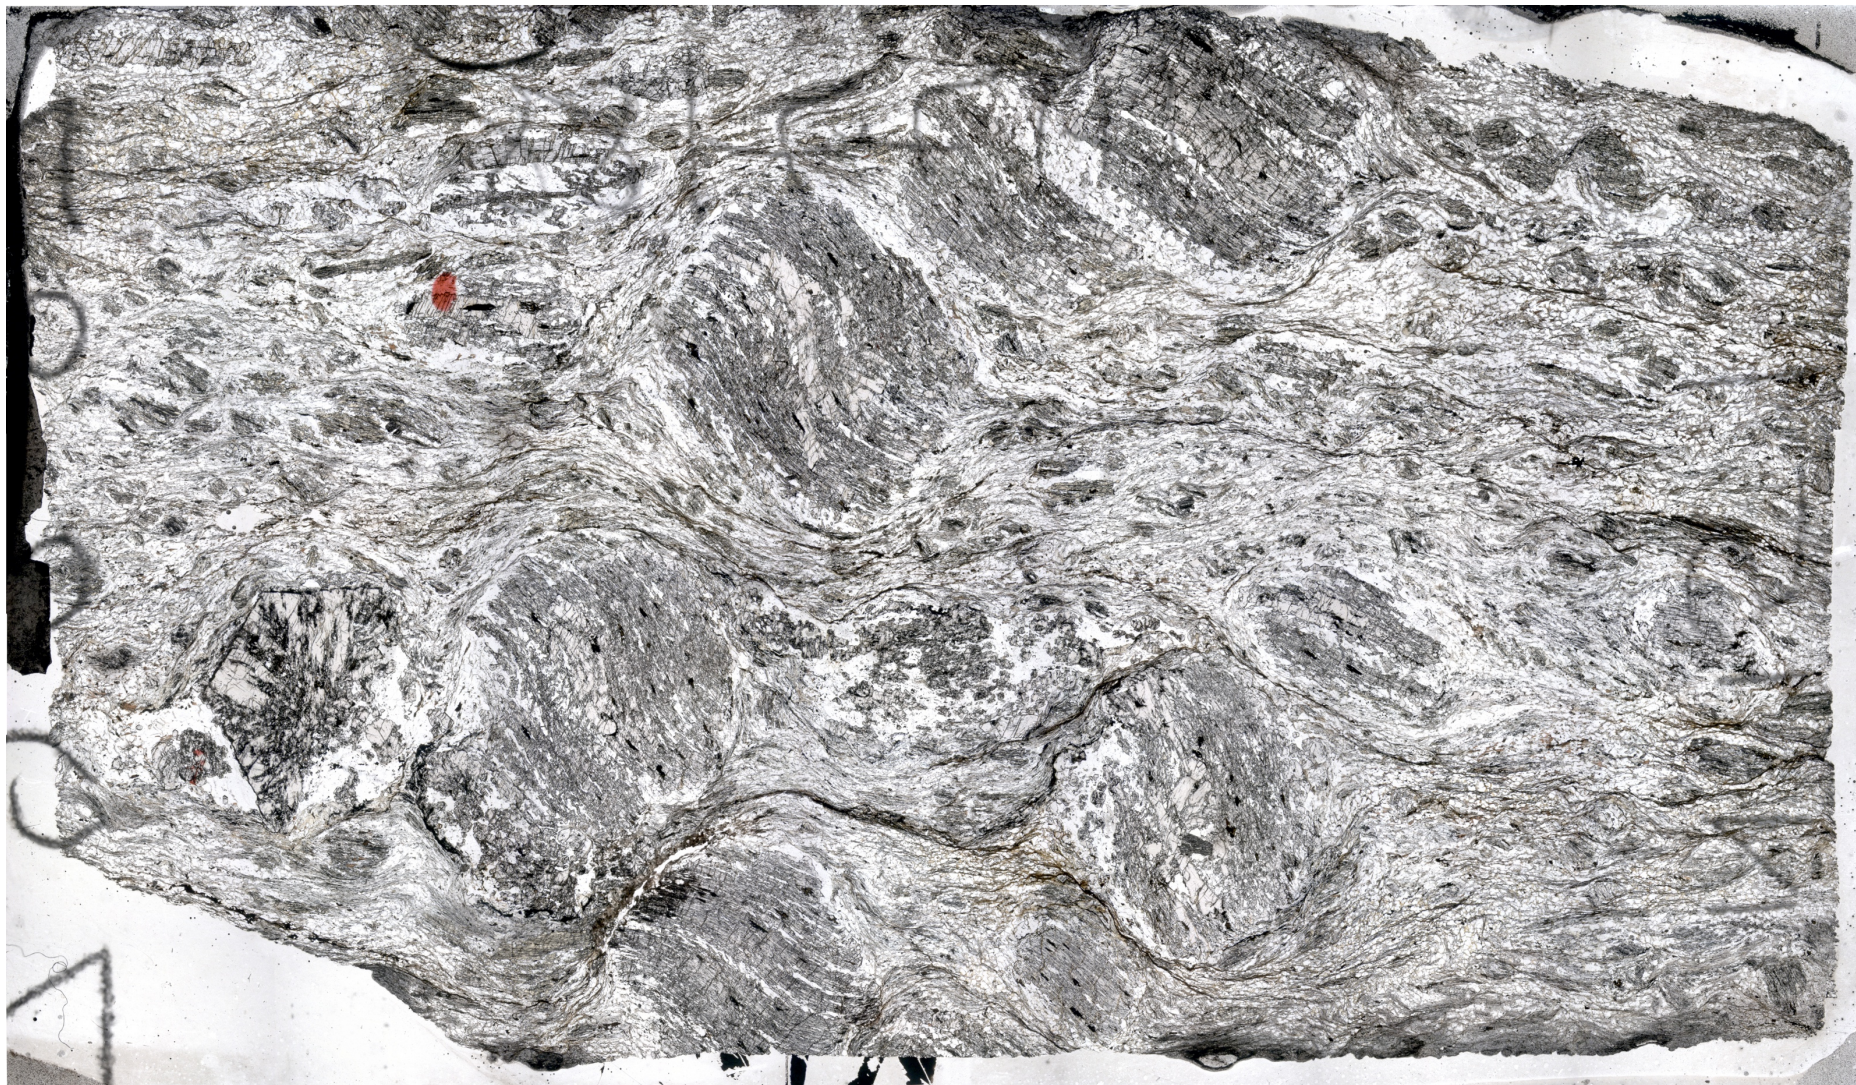

(e)



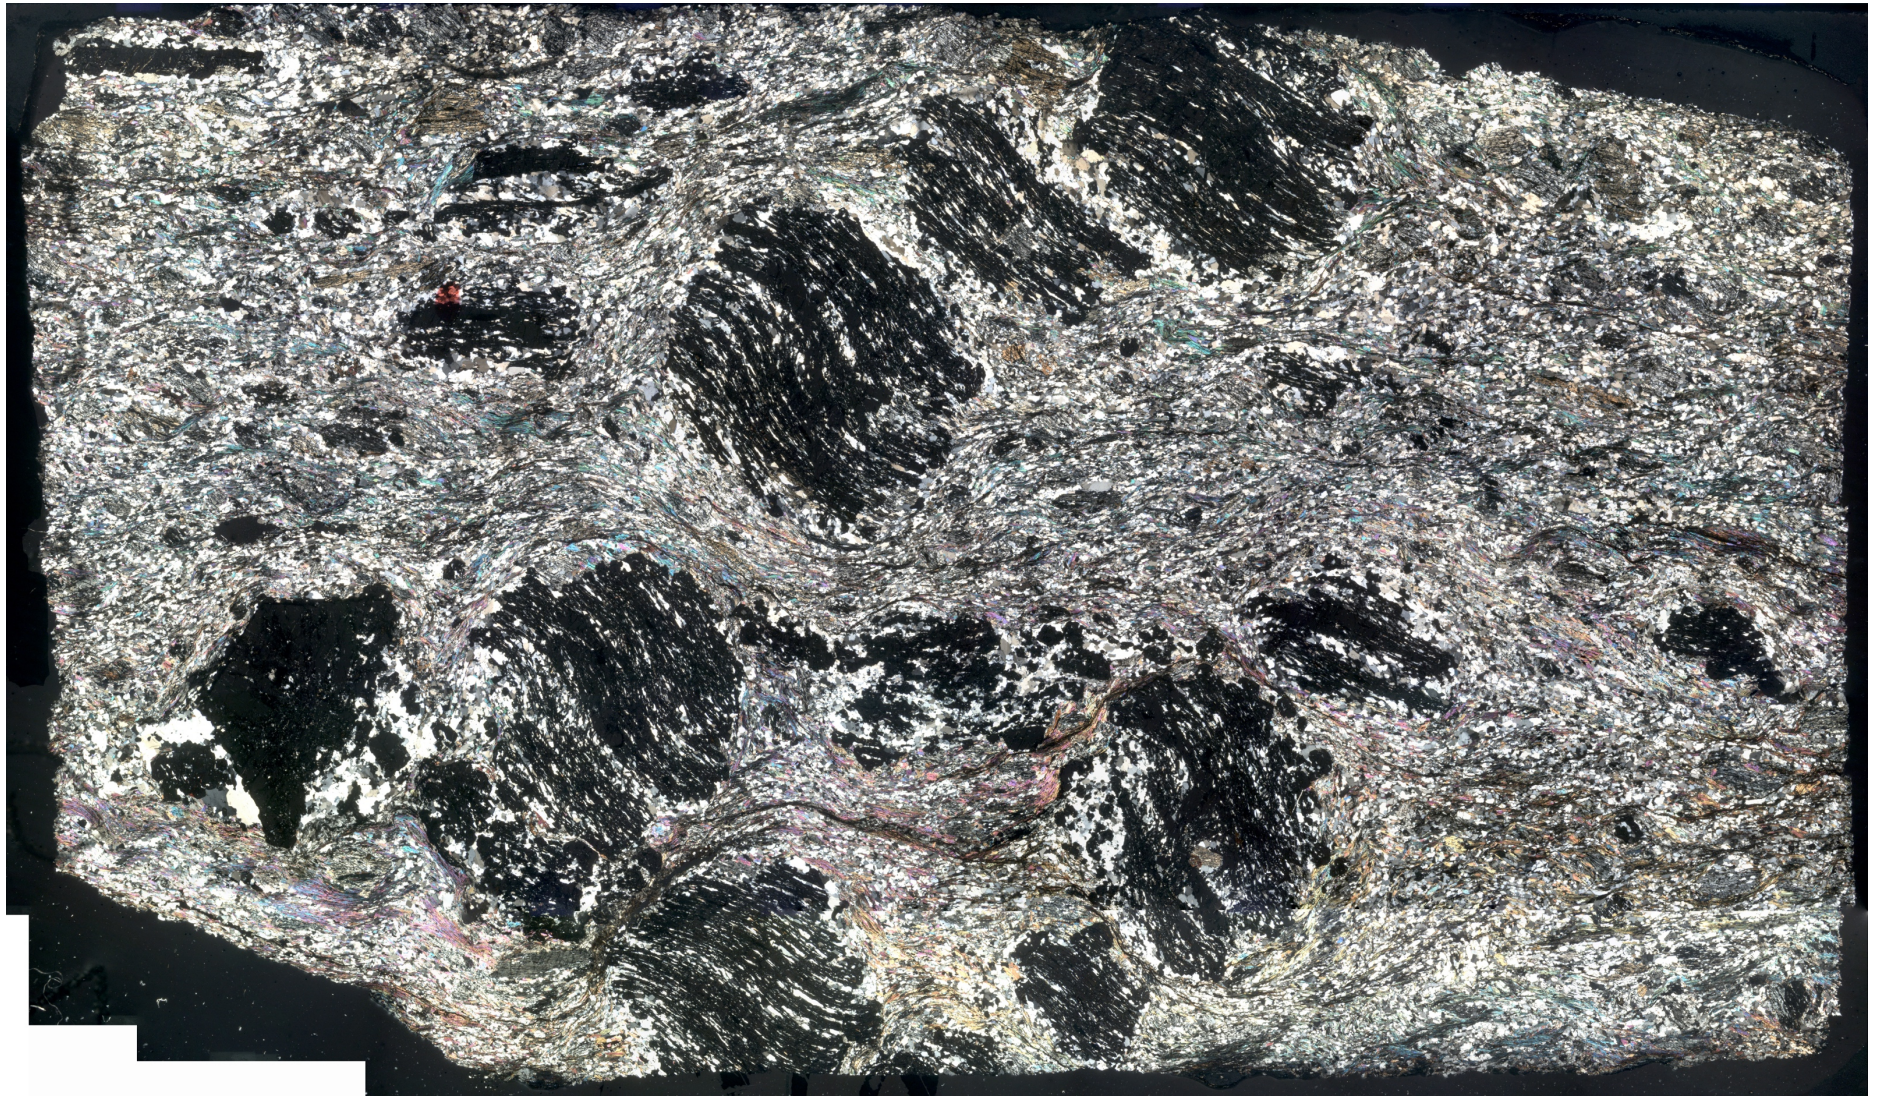

(f)
